# Supplementary material for: In vivo screening platform for shiga toxin-producing Escherichia coli (STEC) using Caenorhabditis elegans as a model
Source: PubMed Central journal article supplement (PMC5831388; doi:10.1371/journal.pone.0193277), 2018-02-28
Supplement: pone.0193277.s001.pdf [file pone.0193277.s001.pdf]

**Screening the effect of EHEC and Shiga toxin-producing *Escherichia coli* (STEC) on fertility and lifespan of *Caenorhabditis elegans***

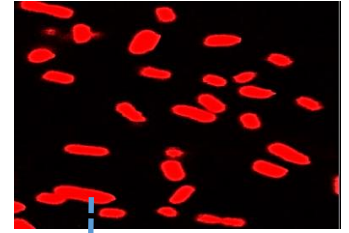

***Escherichia coli* strains used in the study**  
*E. coli* – OP50 as control (1)  
*E. coli* – STEC strains (24)  
 Total n = 25 **STEP-1**

Pathogens shiga toxin producing *E. coli*

Cultivated in TSB Media

**Source of the Strains applied in the study**

U.S. Food Fermentation Laboratory Culture Collection (Wyndmoor, Pa., U.S.A.)

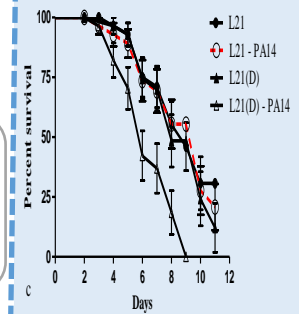

**Nematode (*Caenorhabditis elegans*) Applied as an In-vivo Model**  
**STEP-3**

Nematode synchronizing Wild Type (N2)

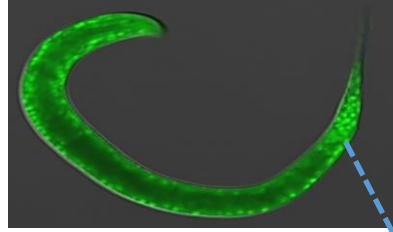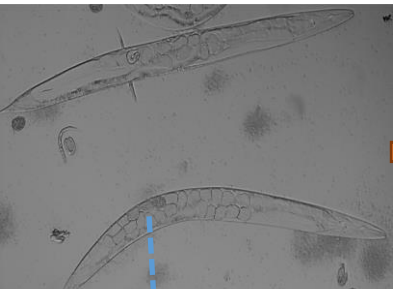

**STEP-4**

**Fertility assay**

Population density

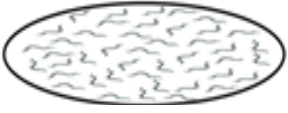

Based on the Colonization-virulence interaction of STEC strains in the intestine of the N2

The STEC *E. coli* (E15, E18 and E22) strains showed increase in colonization which is perpendicularly correlated with decrease in longevity and fertility of the worm (*C. elegans*).

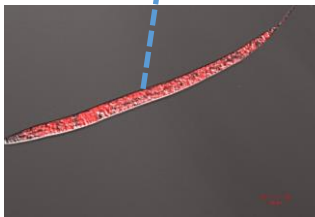

**STEP-5**

**Lifespan assay**

Based on the Colonization-virulence interaction of STEC strains in the intestine of the worms

Most of N2 animals feeding on STEC plates were significantly short-lived compared to those on *E. coli* OP50 plates. (a) *E. coli* O101 strains, (b) *E. coli* O111 strains, (c) *E. coli* O121 strains, (d) *E. coli* O145 strains and (e) *E. coli* O157 strains.

**Conclusion**

Among 24 STEC strains E12 and E18 are considered to be toxic by forming colony in the intestinal tract of *C. elegans* based on the shiga toxin in comparison with the control OP50 Strain

**STEP-7**

**Heat-killed STEC *E. coli* in *C. elegans* - killing assay**

80°C for 10 min

Conventional and qPCR are rapid and accurate detection methods standardized for **TARGETING GENES *stx1* and *stx2***

**PRIMER USED IN THE STUDY**  
 STX1-F/R-O157 – 789bp  
 STX2-F/R-O157 – 1073bp  
 GroEL-F/R-O157 – 1493bp

**STEP-8**

All heat-treated bacteria strains used in the assays increased the longevity against original strains.

Heat Liable Toxic Compounds

**FUTURE APPLICATIONS**

1. Detection of toxin genes with similar PCR profile in patient
2. Study on Mechanism based on Host Pathogen Interaction
